# Supplementary material for: Thermal deprotonation and condensation of melamine in the presence of indium(iii)chloride
Source: Royal Society of Chemistry journal article supplement (doi:10.1039/d4dt01029a), 2024-01-01
Supplement: d4dt01029a1.pdf [file d4dt01029a1.pdf]

## Thermal Deprotonation and Condensation of Melamine in the Presence of Indium(III)chloride

Elaheh Bayat<sup>a</sup>, Markus Ströbele<sup>a</sup>, David Enseling<sup>b</sup>, Thomas Jüstel<sup>b</sup> and H.-Jürgen Meyer<sup>\*a</sup>

### Supporting Information

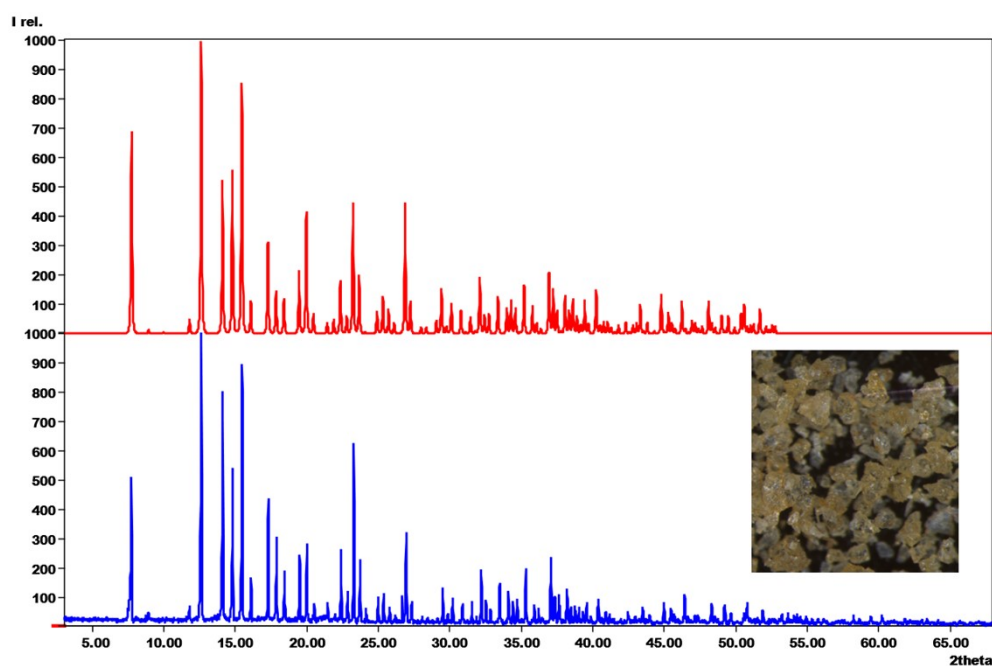

**Figure SI 1.** XRD pattern of the synthesized  $(\text{NH}_4)[(\text{InCl}_2)_3(\text{C}_{12}\text{N}_{20}\text{H}_8)] \cdot \frac{2}{3}[\text{InCl}_3(\text{NH}_3)]$  (bottom), Calculated pattern from single crystal measurement (top) (CCDC code: 2333063).

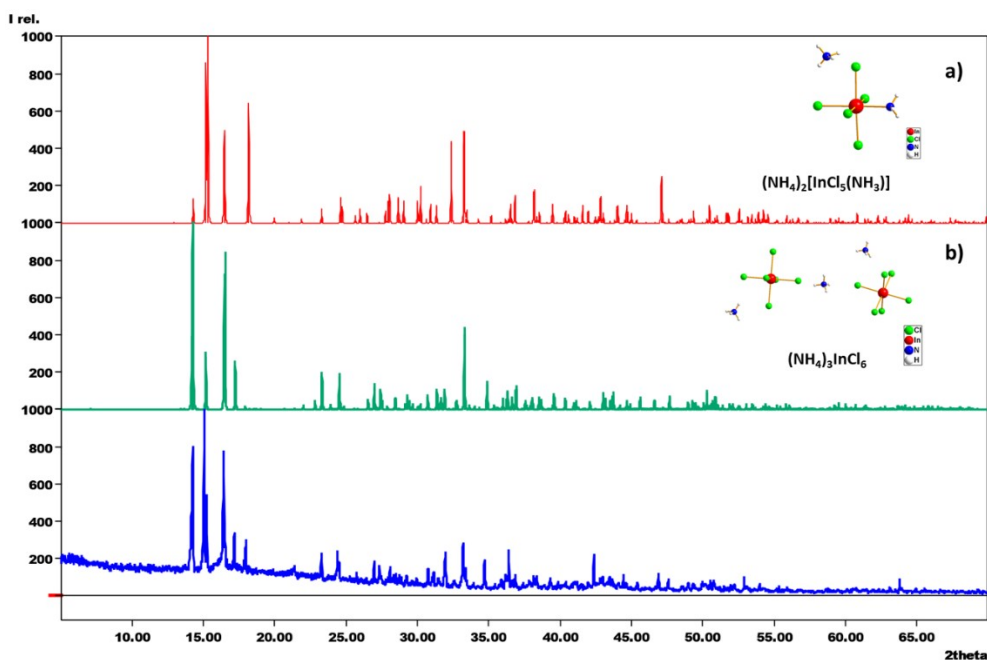

**Figure S1.2.** XRD pattern of the side-phases sublimated on the top part of ampule synthesized along with the main phase of  $(\text{NH}_4)[(\text{InCl}_2)_3(\text{C}_{12}\text{N}_{20}\text{H}_8)] \cdot \frac{2}{3}[\text{InCl}_3(\text{NH}_3)]$  (bottom). **(a)** Calculated pattern from single crystal measurement of  $(\text{NH}_4)_2[\text{InCl}_5(\text{NH}_3)]$  (CCDC code: 2301094) **(b)** Calculated pattern from single crystal measurement of  $(\text{NH}_4)_3\text{InCl}_6$  (CCDC code: 2334831).

**Table S1.** Crystal structure data of  $(\text{NH}_4)_2[\text{InCl}_5(\text{NH}_3)]$ , and  $(\text{NH}_4)_3\text{InCl}_6$  as side phases of the reaction.

| Empirical Formula                          | $(\text{NH}_4)_2[\text{InCl}_5(\text{NH}_3)]$                                 | $(\text{NH}_4)_3\text{InCl}_6$                                              |
|--------------------------------------------|-------------------------------------------------------------------------------|-----------------------------------------------------------------------------|
| CCDC code                                  | 2301094                                                                       | 2334831                                                                     |
| Formula weight (g/mol)                     | 345.19                                                                        | 381.65                                                                      |
| Wavelength (Cu-K $\alpha$ ) (Å)            | 1.54184                                                                       | 1.54184                                                                     |
| Crystal system                             | orthorhombic                                                                  | monoclinic                                                                  |
| Space group                                | <i>Pnma</i>                                                                   | <i>P2<sub>1</sub>/c</i>                                                     |
| Unit cell dimensions (Å)                   | <i>a</i> /Å 13.7070(2)<br><i>b</i> /Å 10.76210(10)<br><i>c</i> /Å 6.93960(10) | <i>a</i> /Å 13.1270(3)<br><i>b</i> /Å 7.78800(10)<br><i>c</i> /Å 12.2894(2) |
| Volume (Å <sup>3</sup> )                   | 1023.70(2)                                                                    | 1192.96(4)                                                                  |
| Z                                          | 4                                                                             | 4                                                                           |
| Density (calculated) (g/cm <sup>3</sup> )  | 2.240                                                                         | 2.125                                                                       |
| Absorption coefficient (mm <sup>-1</sup> ) | 29.980                                                                        | 27.819                                                                      |
| Final R indices ( $I > 2\sigma(I)$ ) a)    | $R_1 = 0.0133$ , $wR_2 = 0.0364$                                              | $R_1 = 0.0148$ , $wR_2 = 0.0371$                                            |

|                      |                                  |                                  |
|----------------------|----------------------------------|----------------------------------|
| R indices (all data) | $R_1 = 0.0133$ , $wR_2 = 0.0364$ | $R_1 = 0.0149$ , $wR_2 = 0.0372$ |
| GOOF                 | 1.264                            | 1.211                            |

**Table S2.** Vibrational frequencies (in  $\text{cm}^{-1}$ ) for In-Ring compared to those of Melamine, Melem, and  $(\text{NH}_4)[(\text{InCl}_2)_3(\text{C}_{12}\text{N}_{20}\text{H}_8)] \cdot \frac{2}{3}[\text{InCl}_3(\text{NH}_3)]$

|                                   | Melamine | Melem | $(\text{NH}_4)[(\text{InCl}_2)_3(\text{C}_{12}\text{N}_{20}\text{H}_8)] \cdot \frac{2}{3}[\text{InCl}_3(\text{NH}_3)]$ |
|-----------------------------------|----------|-------|------------------------------------------------------------------------------------------------------------------------|
| Ring-sextant out-of-plane bending | 813      | 804   | 792                                                                                                                    |
| CNC bending                       | 1193     | 1306  | 1284                                                                                                                   |
| Side-chain CN breathing           | 1434     | 1470  | 1380                                                                                                                   |
|                                   | 1440     |       | 1434                                                                                                                   |
|                                   | 1550     |       | 1504                                                                                                                   |
| $\text{NH}_2$ bending             | 1652     | 1612  | 1647                                                                                                                   |
| NH stretching                     | 3128     | 3119  | 3200                                                                                                                   |
|                                   | 3334     | 3325  | 3348                                                                                                                   |
|                                   | 3421     | 3424  | 3452                                                                                                                   |
|                                   | 3469     | 3487  |                                                                                                                        |

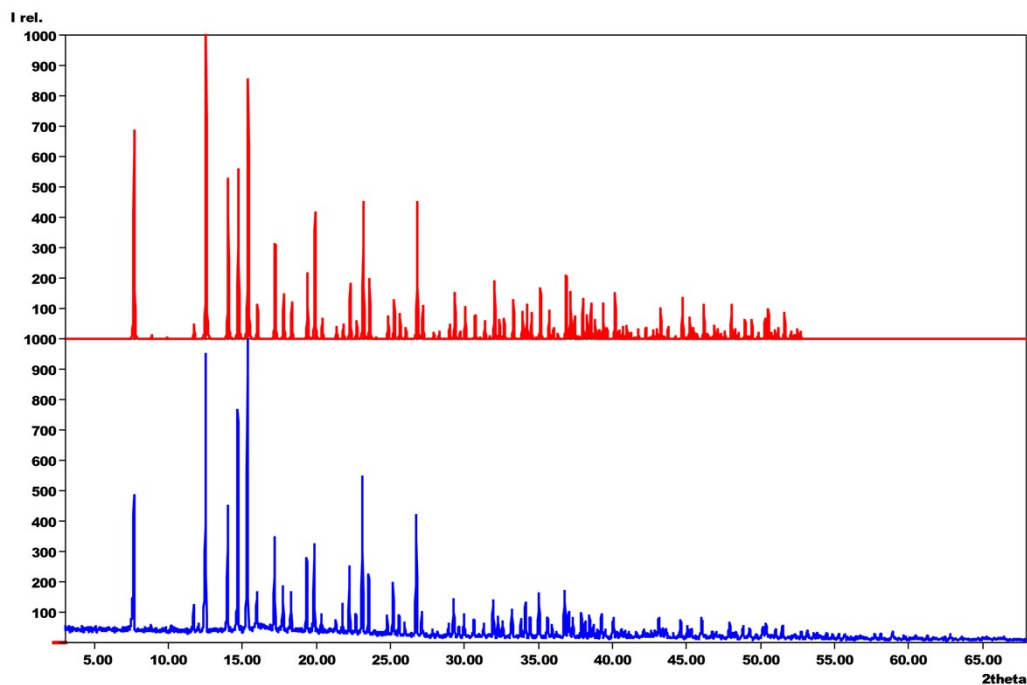

**Figure SI 3.** XRD pattern of the synthesized  $(\text{NH}_4)[(\text{InCl}_2)_3(\text{C}_{12}\text{N}_{20}\text{H}_8)] \cdot \frac{2}{3}[\text{InCl}_3(\text{NH}_3)]$  after two months in ambient condition (bottom), Calculated pattern from single crystal measurement (top) (CCDC code: 2333063).

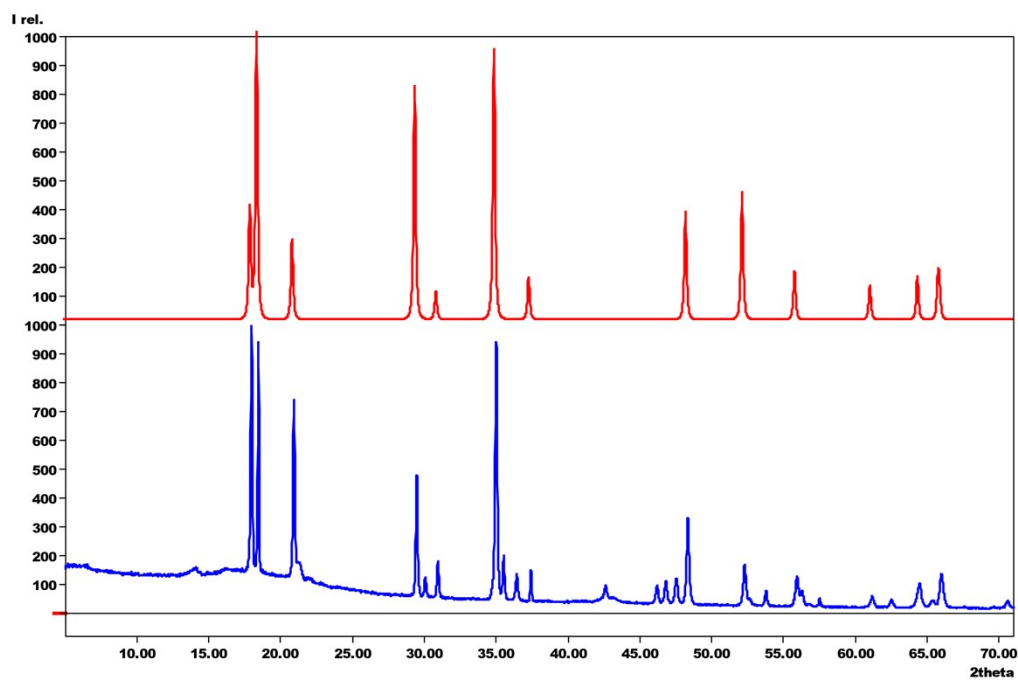

**Figure SI 4.** The XRD pattern taken from decomposed material at  $700^\circ\text{C}$  in TGA analysis(bottom), Calculated pattern from single crystal measurement of  $\text{In}_{2.24}(\text{NCN})_3$ (top)
